# Supplementary material for: The complex binding mode of the peptide hormone H2 relaxin to its receptor RXFP1
Source: PubMed Central journal article supplement (PMC4837482; doi:10.1038/ncomms11344), 2016-04-18
Supplement: ncomms11344-s1.pdf [file ncomms11344-s1.pdf]

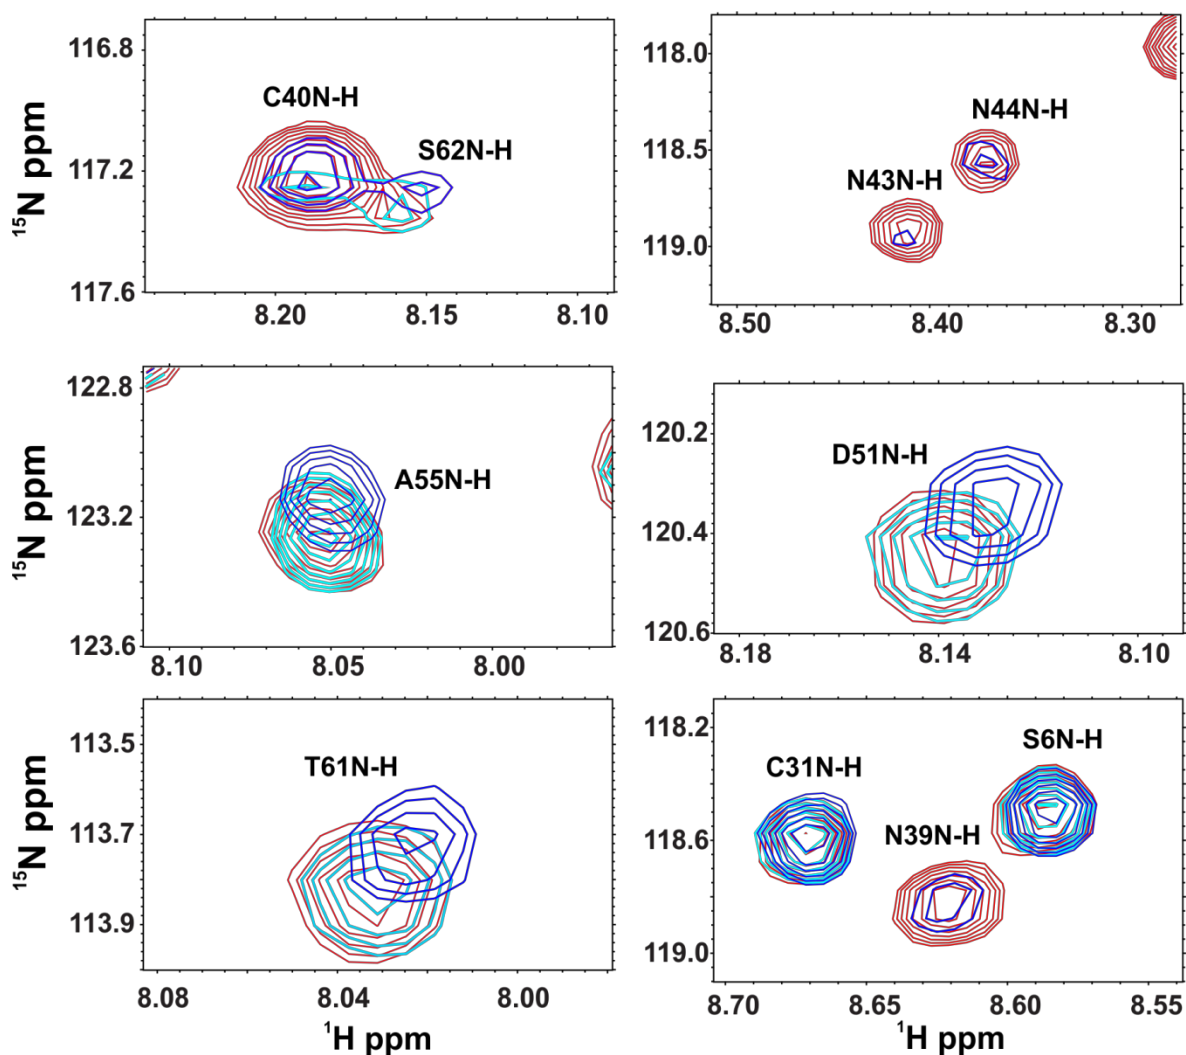

**Supplementary Figure 2. Examples of intensity and chemical changes of 50  $\mu\text{M}$   $^{15}\text{N}$ -labelled RXFP1<sub>(1-72)</sub> in the absence and presence of 0.2  $\mu\text{M}$   $\text{Mn}^{2+}$ -DTPA-(A)-H2 and competed with 50  $\mu\text{M}$  H2 relaxin. In red are resonances of several NH groups in the absence of ligands. Upon addition of  $\text{Mn}^{2+}$ -DTPA-(A)-H2 some resonances completely broaden (Asn39, Asn43 and Asn44), while others are attenuated (Cys40) or remain unaffected (coloured in cyan). Addition of 50  $\mu\text{M}$  H2 relaxin competes with  $\text{Mn}^{2+}$ -DTPA-(A)-H2 so that these broadened resonances regain intensity (coloured in blue). Resonances that belong to the H2 relaxin binding site (Fig. 2) shift on addition of H2 relaxin (for example, Asp51, Thr61 and Ser62). These residues while not broadened by  $\text{Mn}^{2+}$ -DTPA-(A)-H2, but are broadened by the stoichiometrically equivalent addition of H2 relaxin.**

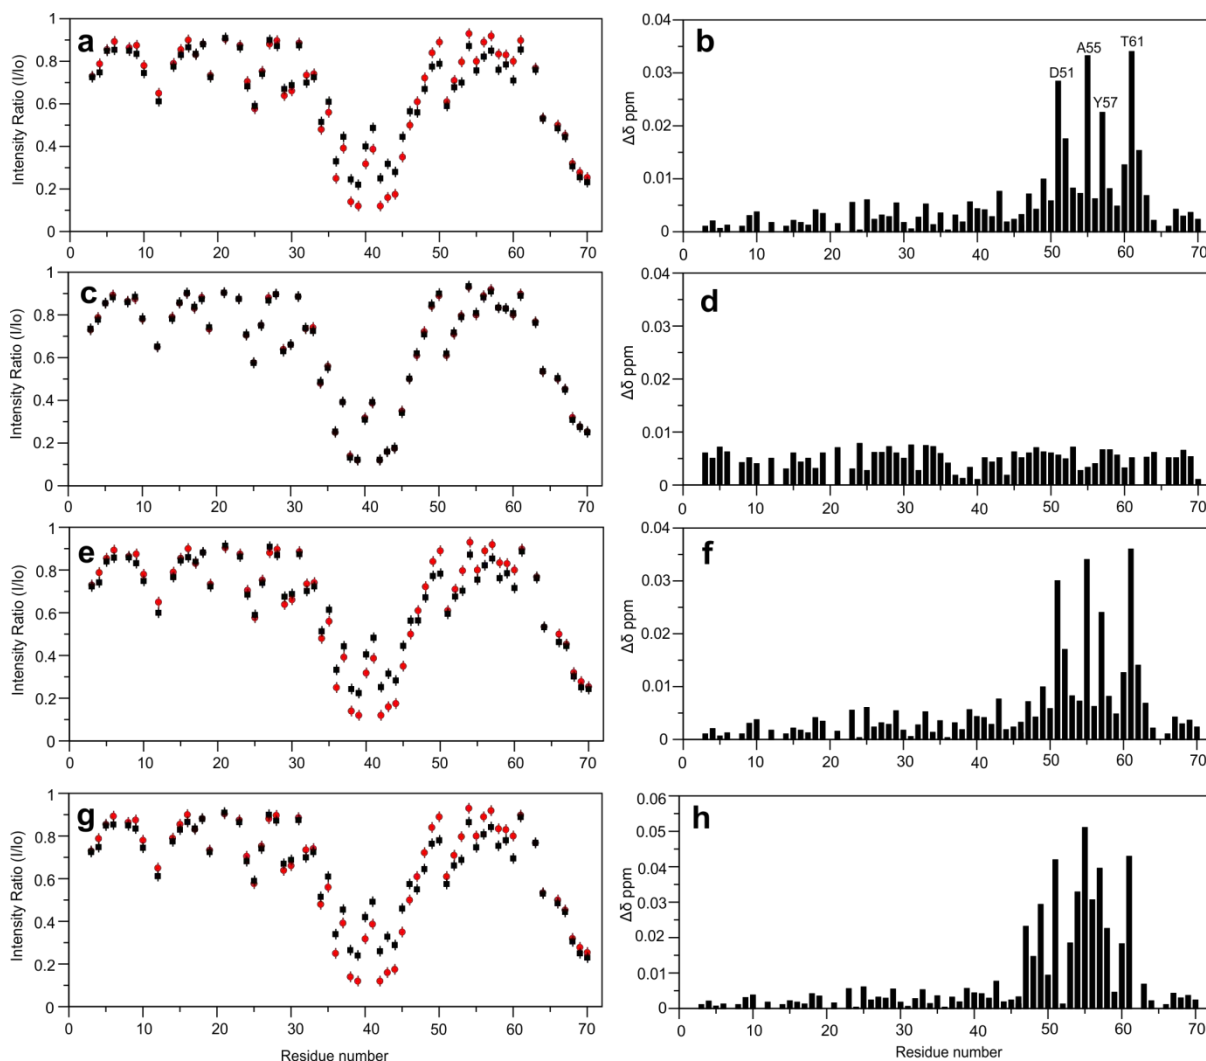

**Supplementary Figure 3. Plots of intensity ratios and average chemical shift changes of 50  $\mu\text{M}$   $^{15}\text{N}$ -labelled RXFP1<sub>(1-72)</sub> in the presence of 0.2  $\mu\text{M}$   $\text{Mn}^{2+}$ -DTPA-(A)-H2 and competed with 50  $\mu\text{M}$  H2 relaxin or analogues. (a) and (b) H2 relaxin, (c) and (d) A-chain (F23A) H2 relaxin and (e) and (f) B-chain (B1-25), (g) and (h) B-chain (5-29). In (a), (c), (e) and (g) (red circles) represent  $^{15}\text{N}$ -labelled RXFP1<sub>(1-72)</sub> in the presence of only  $\text{Mn}^{2+}$ -DTPA-(A)-H2; (black squares) indicate changes to the intensity ratio following addition of H2 relaxin or analogue. (b), (d), (f) and (h) show the change in average  $^1\text{H}$  and  $^{15}\text{N}$  chemical shifts after titration of the RXFP1<sub>(1-72)</sub> and  $\text{Mn}^{2+}$ -DTPA-(A)-H2 complex with one molar equivalent of H2 relaxin or analogue. Experiments were conducted at pH 6.8 and 25  $^\circ\text{C}$ . Error bars represent the average estimated experimental noise for the respective NMR experiment.**

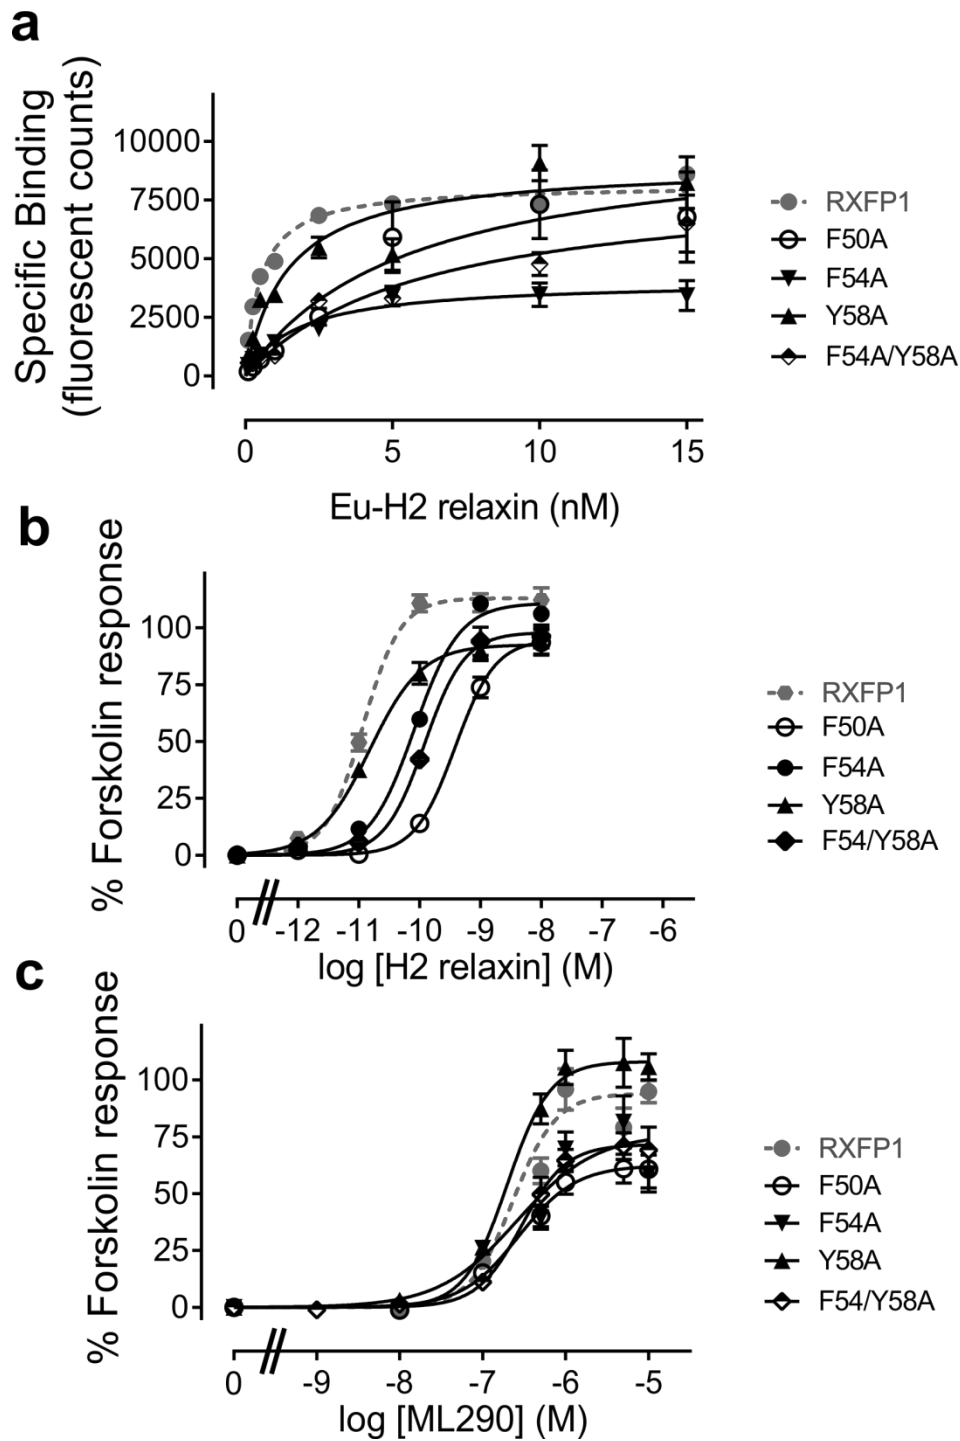

**Supplementary Figure 4. H2 relaxin binding and activation of wild type and LDLa-linker mutants of RXFP1.** (a) Competition binding using Eu-H2 relaxin. (b) H2 relaxin-induced cAMP responses (c) ML290-induced cAMP responses. Symbols represent mean values  $\pm$  S.E.M from triplicate values in a minimum of three independent experiments.

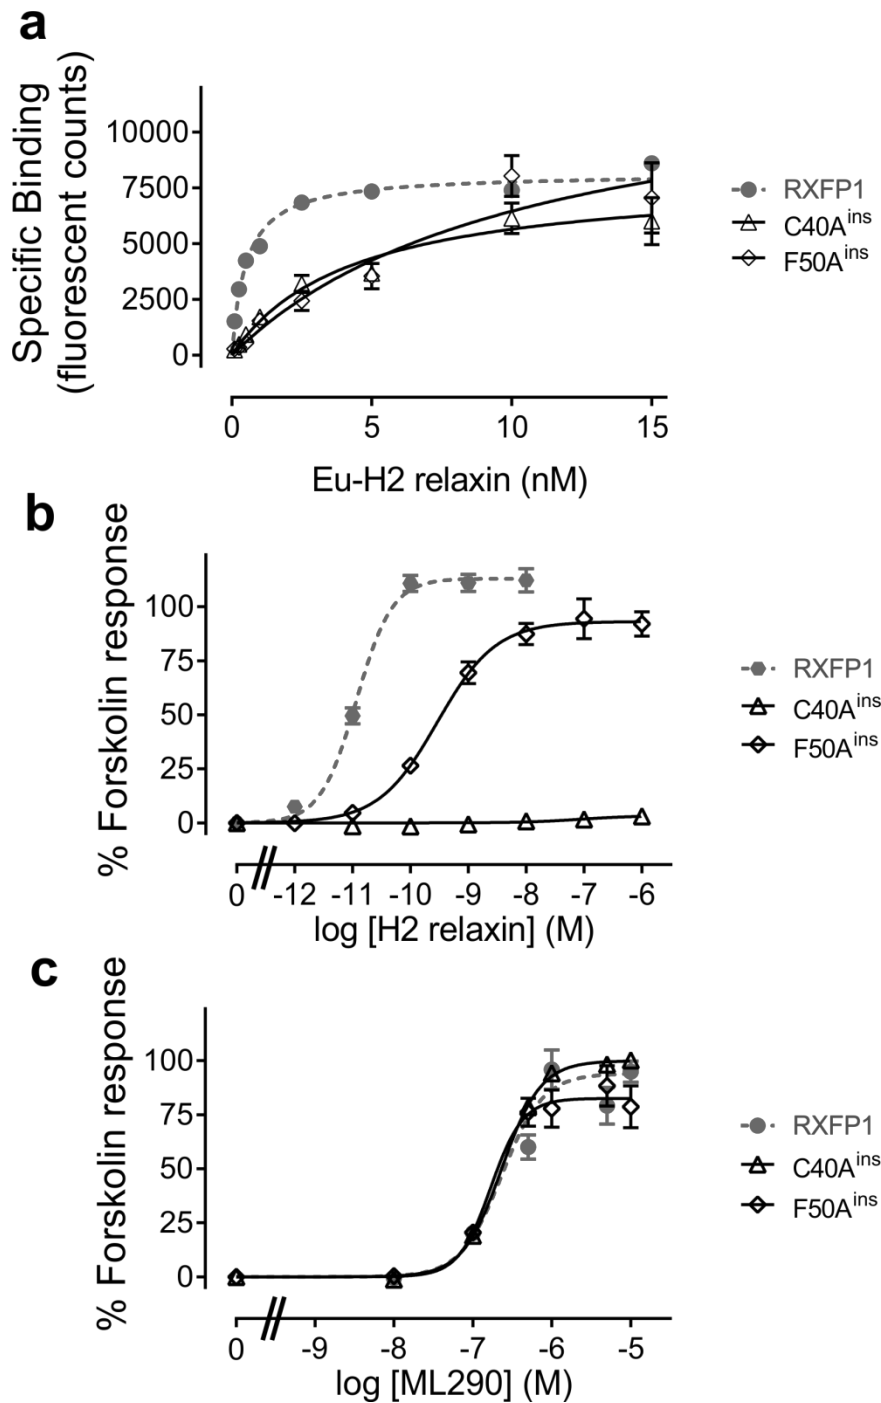

**Supplementary Figure 5. H2 relaxin binding and activation of wild type and LDLa-linker insertion mutants of RXFP1.** (a) Competition binding using Eu-H2 relaxin (b) H2 relaxin-induced cAMP responses (c) ML290-induced cAMP responses. Symbols represent mean values  $\pm$  S.E.M from triplicate values in a minimum of three independent experiments.

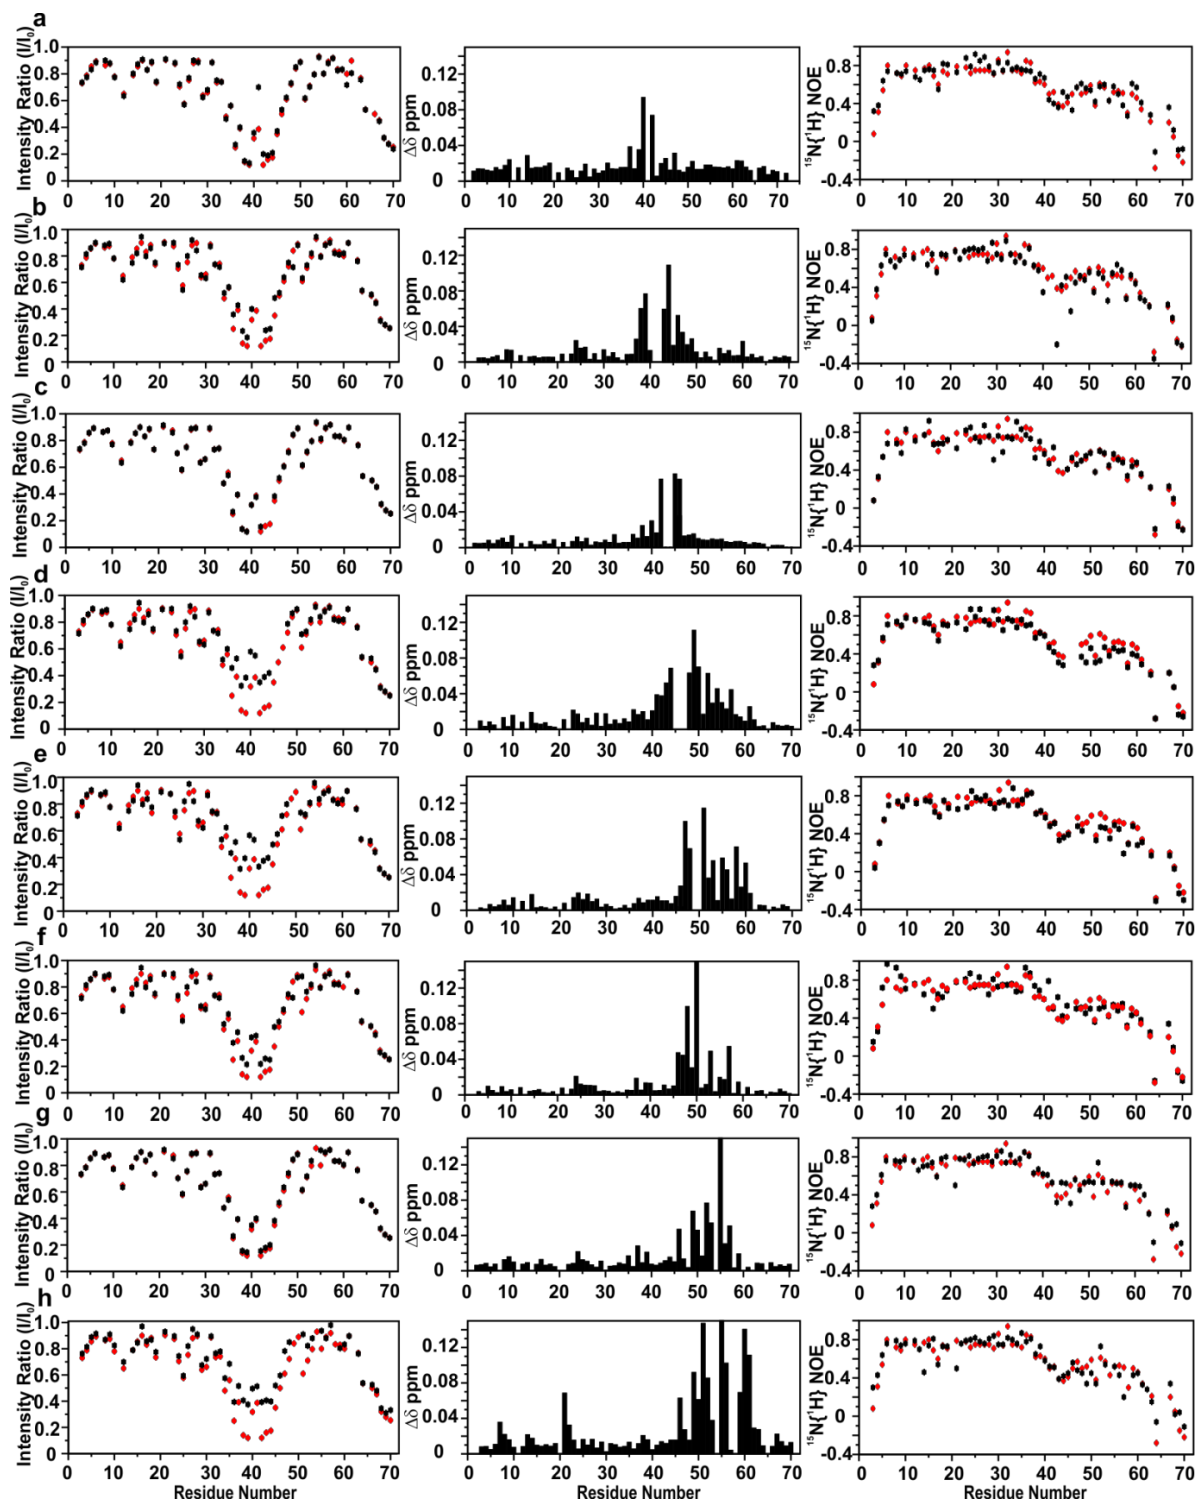

**Supplementary Figure 6. Comparison of binding of  $Mn^{2+}$ -DTPA-(A)-H2, chemical shift differences and  $^{15}N\{^1H\}$ -NOEs of wild type and mutants of RXFP<sub>(1-72)</sub>.** The first column compares a titration of 50  $\mu M$  mutant (black) to wild-type (red) LDLa-linker with 0.2  $\mu M$   $Mn^{2+}$ -DTPA-(A)-H2. The second column the average  $^1H$  and  $^{15}N$  chemical shift differences ( $\Delta\delta$ ) of mutant to wild-type protein and the third column the  $^{15}N\{^1H\}$ -NOE of mutant (black) to wild-type (red) LDLa-linker. Experiments were conducted at pH 6.8 and 25  $^{\circ}C$  on (a) C40A<sup>ins</sup>, (b) G41A/D42A, (c) N43A/N44A, (d) G45A/W46A, (e) F50A, (f) F50A<sup>ins</sup>, (g) F54A, and (h) F54A/Y58A. Error bars represent the average estimated experimental noise for the respective NMR experiment.

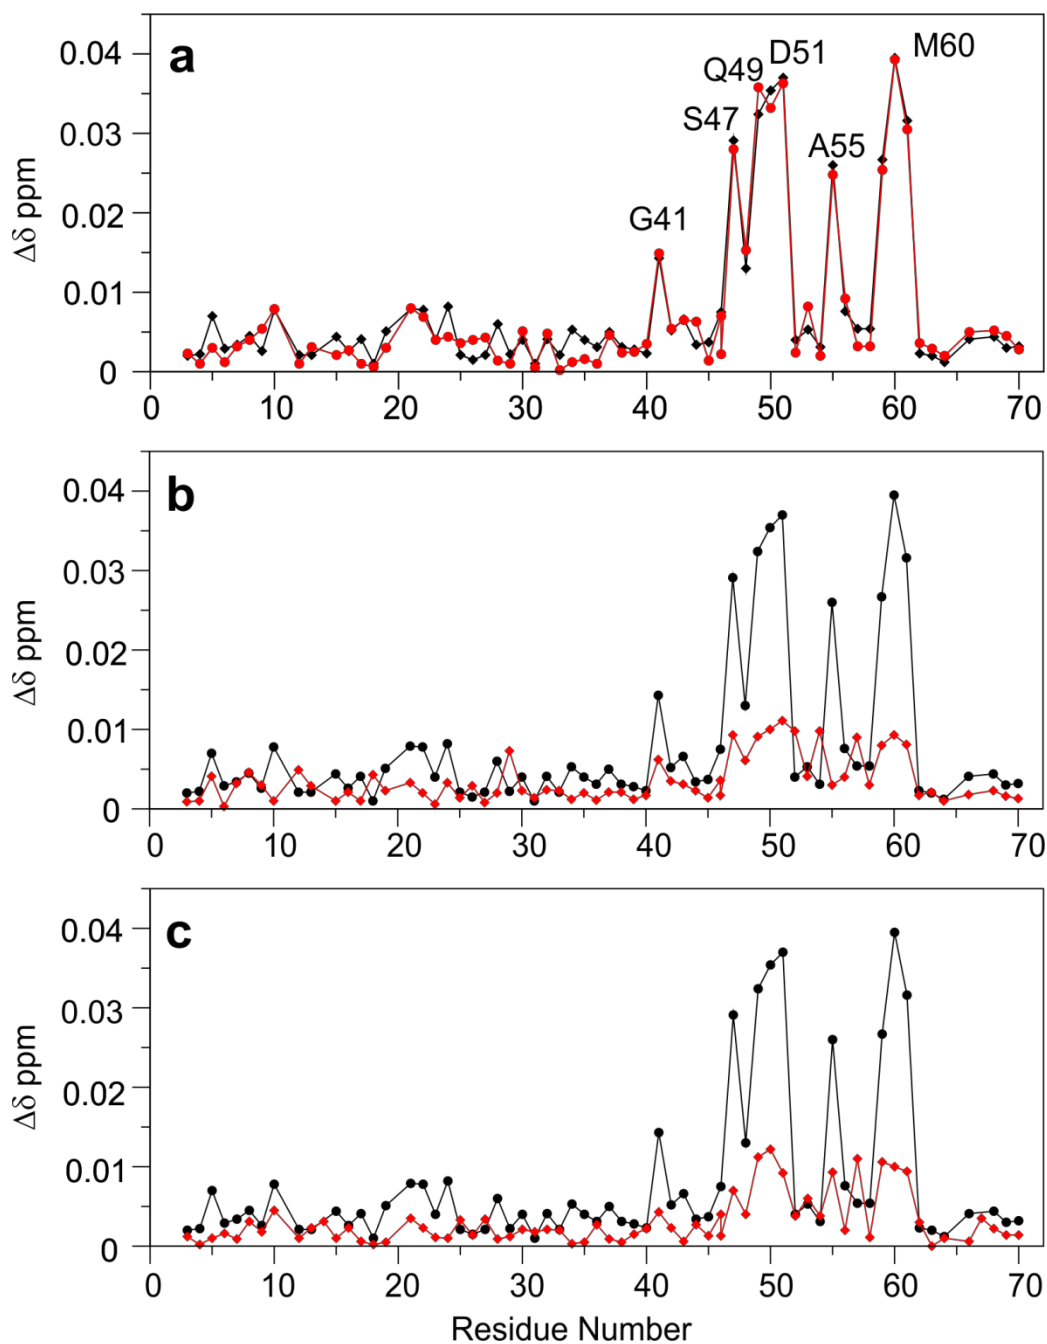

**Supplementary Figure 7. Chemical shift differences following a titration of <sup>15</sup>N-labelled RXFP1<sub>(1-72)</sub> with the three mutants (a) Trp479 (b) Phe564 and (c) Pro565 of EL1<sup>(475-486)</sup>/EL2-RXFP1.** In each panel in black the average chemical shift changes of <sup>1</sup>H and <sup>15</sup>N for a titration of 50  $\mu$ M <sup>15</sup>N-labelled RXFP1<sub>(1-72)</sub> with 20-times molar excess of wild type EL1<sup>(475-486)</sup>/EL2-RXFP1 is shown. In red the results of a similar titration of <sup>15</sup>N-labelled RXFP1<sub>(1-72)</sub> with 20-times molar excess of each of the mutants is shown. Spectra were acquired at pH 6.8 and 25 °C.

**Supplementary Table 1. Primers used in site-directed mutagenesis of RXFP1 and RXFP1<sub>(1-72)</sub>.**

| Mutant              | Forward primer 5' – 3'                                  | Reverse primer 5' – 3'                                     |
|---------------------|---------------------------------------------------------|------------------------------------------------------------|
| G41A/D42A           | CTGTGCCGCCAACAAATGGATGGTCTCTGCAATTTGACAAATATTTG         | GTTGGCGGCACAGTTGTCCTCATCGGCCTG                             |
| N43A/N44A           | GACGCCGCCGGATGGTCTCTGCAATTTGACAAATATTTTGCC              | CATCCGGCGGCGTCTCCACAGTTGTCCTCATCGG                         |
| G45A/W46A           | CAATGCCGCCTCTCTGCAATTTGACAAATATTTTGCCAGTACTA<br>C       | GAGAGGGCGGCATTGTTGTCTCCACAGTTGTCCTCATCG                    |
| G41A                | CTGTGCCGACAACAATGGATGGTCTCTGCAATTTGACAAATATTTG          | CTGGGCACAGTTGTCCTCATCGGCCTG                                |
| D42A                | GGAGCCAACAATGGATGGTCTCTGCAATTTGACAAATATTTTG             | GTTGGCTCCACAGTTGTCCTCATCGGCCTG                             |
| N43A                | GACGCCAATGGATGGTCTCTGCAATTTGACAAATATTTTGCC              | CCATTGGCGTCTCCACAGTTGTCCTCATCGG                            |
| N44A                | CAACGCCGGATGGTCTCTGCAATTTGACAAATATTTTGCC                | CATCCGGCGTGTCTCCACAGTTGTCCTCATCGG                          |
| G45A                | CAATGCCCTGGTCTCTGCAATTTGACAAATATTTTGCCAGTACTA<br>C      | CCAGGCATTGTTGTCTCCACAGTTGTCCTCATCG                         |
| W46A                | GGAGCCTCTCTGCAATTTGACAAATATTTTGCCAGTACTAC               | GAGAGGGCTCCATTGTTGTCTCCACAGTTGTCCTCATCG                    |
| S47A/L48A           | GATGGGCTGCGCAATTTGACAAATATTTTGCCAGTACTACAAA<br>ATGACTTC | CAAATTGCGCAGCCCATCCATTGTTGTCTCCACAGTTGTCCTCA<br>TC         |
| F50A                | GCAAGCTGACAAATATTTTGCCAGTACTACAAAATGACTTCCC             | AATATTTGTCAGCTTGCAGAGACCATCCATTGTTGTCTCC                   |
| Q49A/F50A           | CTCTGGCAGCTGACAAATATTTTGCCAGTACTACAAAATGACTT<br>CC      | ATATTTGTCAGCTGCCAGAGACCATCCATTGTTGTCTCCACAG                |
| D51A                | CAATTTGCCAAATATTTTGCCAGTACTACAAAATGACTTCC               | CAAAATATTTGGCAAATTGCAGAGACCATCCATTGTTGTCTC                 |
| K52A                | GACGCATATTTTGCCAGTACTACAAAATGACTTCCCAATATC              | CAAAATATGCGTCAAATTGCAGAGACCATCCATTGTTGTCT                  |
| F54A                | CAAATATGCTGCCAGTACTACAAAATGACTTCCCAATATCC               | CTGGCAGCATATTTGTCAAATTGCAGAGACCATCCATTGTTG                 |
| A55L                | CAAAATTTTCTCAGTACTACAAAATGACTTCCCAATATCCTTT<br>TGAG     | GTAAGTGAAGAAAATATTTGTCAAATTGCAGAGACCATCCATTG<br>TTGTC      |
| A55S                | CAAAATTTTCCAGTACTACAAAATGACTTCCCAATATCCTTT<br>TGAG      | GTAAGTGAAGAAAATATTTGTCAAATTGCAGAGACCATCCATTG<br>TTGTC      |
| Y57A                | CAGTGCTACAAAATGACTTCCCAATATCCTTTTGAGGCAG                | GTAGGCACTGGCAAATATTTGTCAAATTGCAGAGACCATC                   |
| Y58A                | GCCAGTACGCCAAAATGACTTCCCAATATCCTTTTGAGGCAGA<br>AACAC    | CATTTTGGCGTAACTGGCAAATATTTGTCAAATTGCAGAGAC<br>CATCCATTGTTG |
| F54A/Y58A           | GTTACGCCAAAATGACTTCCCAATATCCTTTTGAGGCAG                 | CATTTTGGCGTAACTGGCAGCATATTTGTCAAATTGCAG                    |
| M60A                | CTACAAAGCGACTTCCCAATATCCTTTTGAGGCAGAAAACACC             | GGGAAGTGCCTTTGTAGTAACTGGCAAATATTTGTCAAATTG<br>CAG          |
| T61A                | CAAAATGGCTTCCCAATATCCTTTTGAGGCAGAAAACACC                | GGAAGCCATTTGTAGTAACTGGCAAATATTTGTCAAATTGC<br>AG            |
| F66A                | CCTGCTGAGGCAGAAAACACCTGAATGTTTGGTC                      | CTCAGCAGGATATTGGGAAGTCATTTGTAGTAACTGGC                     |
| E67A                | CTTTTGCGGCAGAAAACACCTGAATGTTTGGTCGG                     | CTGCCGAAAAGGATATTGGGAAGTCATTTGTAGTAACTGG                   |
| C40A <sup>INS</sup> | CAACTGTGCGGGAGACAACAATGGATGGT CTC                       | GTCTCCCGCACAGTTGTCCTCATCGGCC                               |
| F50A <sup>INS</sup> | GGTCTCTGCAATTTGCCGACAATATTTTGCCAGTACTACAAA<br>TG        | GGCAAATTGCAGAGACCATCCATTGTTGTCTCCACAGTTG                   |
| E67A <sup>INS</sup> | CAATATCCTTTTGAGGCCGCAGAAAACACCTGAATGTTTGG               | GGCCTCAAAGGATATTGGGAAGTCATTTGTAGTAACTGG                    |
| A68 <sup>A</sup>    | CCTTTTGAGGAAAACACCTGAATGTTTGGTCGGTCTGTGCC               | CAGGTGTTCTCAAAGGATATTGGGAAGTCATTTGTAGTA<br>ACTG            |



**Supplementary Table 2: Primers used in site directed mutagenesis of EL1<sup>(475-486)</sup>/EL2-GB1 construct.**

| Mutant                              | Forward primer 5'-3'          | Reverse Primer 5'-3'         |
|-------------------------------------|-------------------------------|------------------------------|
| EL1 <sup>(475-486)</sup> /EL2-GB1cs | TACTCATTCTCAGGGCGGCACAG       | GCCGCCCTGAGAATGAGTACTCTCC    |
| W479A                               | GCGCAGCTGGCGATGGAGAGTACTCAT   | CTCTCCATCGCCAGCTGCGCCATATG   |
| F564A                               | GGAGTATGCGCCCCTCTTCATTCAGAAGA | ATGAAGAGGGGCGCATACTCCATTGGTG |
| P565A                               | GTATGCTTCGCTCTTCATTCAGAAGATAC | GAATGAAGAGCGAAGCATACTCCATTGG |
